# Supplementary material for: Influence of nutrition on infection and re-infection with soil-transmitted helminths: a systematic review
Source: PubMed Central journal article supplement (PMC4032457; doi:10.1186/1756-3305-7-229), 2014-05-19
Supplement: 1756-3305-7-229-S1.pdf [file 1756-3305-7-229-S1.pdf]

| Databases                                                                                                                                                                  | Search sets                                                                                                                                                                                                                                                                                                                                                                                                                                                                                                                                                                                                                                                                                                                                                                                                                                                                                                                                  |
|----------------------------------------------------------------------------------------------------------------------------------------------------------------------------|----------------------------------------------------------------------------------------------------------------------------------------------------------------------------------------------------------------------------------------------------------------------------------------------------------------------------------------------------------------------------------------------------------------------------------------------------------------------------------------------------------------------------------------------------------------------------------------------------------------------------------------------------------------------------------------------------------------------------------------------------------------------------------------------------------------------------------------------------------------------------------------------------------------------------------------------|
| <b>1) Pubmed/Medline</b><br><b>2) Embase</b><br><b>3) Cochrane Library</b><br><b>4) Cochrane Central Register of Controlled Trials</b><br><b>5) Virtual Health Library</b> | <ul style="list-style-type: none"> <li>▪ Reinfection AND nutrition</li> <li>▪ Reinfection AND undernutrition</li> <li>▪ Reinfection AND malnutrition</li> <li>▪ Reinfection AND iron</li> <li>▪ Reinfection AND zinc</li> <li>▪ Reinfection AND vitamin</li> <li>▪ Reinfection AND nutritional supplementation</li> <li>▪ Multiparasitism AND nutrition</li> <li>▪ Polyparasitism AND nutrition</li> <li>▪ Infection intensity AND nutrition</li> <li>▪ Soil-transmitted helminths AND nutrition</li> <li>▪ Soil-transmitted helminths AND reinfection</li> <li>▪ Soil-transmitted helminths AND undernutrition</li> <li>▪ Soil-transmitted helminths AND micronutrient supplementation</li> <li>▪ Hookworm AND nutritional supplementation</li> <li>▪ <i>Trichuris</i> AND nutritional supplementation</li> <li>▪ <i>Ascaris</i> AND nutritional supplementation</li> <li>▪ <i>Strongyloides</i> AND nutritional supplementation</li> </ul> |
| <b>6) Science Direct</b>                                                                                                                                                   | All the above except: <ul style="list-style-type: none"> <li>▪ Infection intensity AND nutrition</li> </ul>                                                                                                                                                                                                                                                                                                                                                                                                                                                                                                                                                                                                                                                                                                                                                                                                                                  |
| <b>7) VIP Information</b><br><b>8) China National Knowledge Infrastructure</b>                                                                                             | <ul style="list-style-type: none"> <li>▪ 土源性蠕虫 (Soil-transmitted helminths)</li> <li>▪ 蛔虫感染 (Ascariasis)</li> <li>▪ 鞭虫感染 (Trichuriasis)</li> <li>▪ 钩虫感染 (Ancylostomiasis)</li> </ul>                                                                                                                                                                                                                                                                                                                                                                                                                                                                                                                                                                                                                                                                                                                                                         |
