# Supplementary material for: Influence of nutrition on infection and re-infection with soil-transmitted helminths: a systematic review
Source: PubMed Central journal article supplement (PMC4032457; doi:10.1186/1756-3305-7-229), 2014-05-19
Supplement: 1756-3305-7-229-S2.pdf [file 1756-3305-7-229-S2.pdf]

| Study                              | Reasons for exclusion                                                                                                                     |
|------------------------------------|-------------------------------------------------------------------------------------------------------------------------------------------|
| <i>Ahmann et al. 1933</i>          | Case series of 3 individuals                                                                                                              |
| <i>Bundy et al. 1987</i>           | A review on the mechanisms of interactions between helminths and host malnutrition                                                        |
| <i>Figaro-Fletcher et al. 1988</i> | Unable to obtain full text; only the abstract was available                                                                               |
| <i>Quihui-Cota et al. 2004</i>     | A cross-sectional study which is unable to demonstrate causality                                                                          |
| <i>Hughes et al. 2006</i>          | Focuses on general interactions between malnutrition and immune impairment without being specific for soil-transmitted helminth infection |
| <i>Koski et al. 2001</i>           | A review on the effects of nutritional deficiencies on gastrointestinal nematodes of humans, livestock and laboratory rodents             |
| <i>Neumann et al. 1975</i>         | Focuses on general immunologic responses in malnourished children without being specific for soil-transmitted helminth infection          |
| <i>Tripathy et al. 1971</i>        | Case series of 12 individuals                                                                                                             |
